# Supplementary material for: Germline Variants of CYBA and TRPM4 Predispose to Familial Colorectal Cancer
Source: MDPI journal article supplement (doi:10.3390/cancers14030670), 2022-01-28
Supplement: s1 [file s1]

**Supplementary Table S2.** Loss-of-function variants segregated with the disease in 15 colorectal cancer families.

| Family_ID | Gene     | Gene name                                                                                      | Chrom_Pos_Ref_Alt       | Loss-of-function variation | Effect*                                   | CADD_PHRED_score | Function                                                                         |
|-----------|----------|------------------------------------------------------------------------------------------------|-------------------------|----------------------------|-------------------------------------------|------------------|----------------------------------------------------------------------------------|
| Family_4  | ARRDC4   | arrestin domain containing 4                                                                   | 15_98512490_C_T         | stopgain SNV               | p.Arg255Ter                               | 44               | protein ubiquitination, glucose metabolism, innate immunity                      |
| Family_7  | ZNF471   | zinc finger protein 471                                                                        | 19_57036072_C_CAA       | frameshift insertion       | p.Thr214LysfsTer176                       | 35               | transcription regulation                                                         |
| Family_7  | HEXB     | hexosaminidase B (beta polypeptide)                                                            | 5_73989526_C_T          | stopgain SNV               | p.Arg170Ter                               | 37               | degradation of GM2 gangliosides                                                  |
| Family_8  | CYBA     | <b>cytochrome b-245, alpha polypeptide</b>                                                     | <b>16_88713203_AG_A</b> | <b>frameshift deletion</b> | <b>p.Phe83AsnfsTer41</b>                  | <b>25.3</b>      | <b>superoxide generation</b>                                                     |
| Family_9  | ZNF408   | zinc finger protein 408                                                                        | 11_46726628_C_T         | stopgain SNV               | p.Gln460Ter                               | 36               | transcription regulation in retina                                               |
| Family_11 | TRPM4    | <b>transient receptor potential cation channel subfamily M member 4</b>                        | <b>19_49661448_G_T</b>  | <b>splicing</b>            | <b>c.25-1 G&gt;T<br/>p.Ser9LeufsTer17</b> | <b>26.1</b>      | <b>calcium-activated nonselective ion channel, regulation of mucin secretion</b> |
| Family_12 | LGALS3BP | lectin, galactoside-binding, soluble, 3 binding protein                                        | 17_76969123_C_T         | stopgain SNV               | p.Trp186Ter                               | 35               | integrin-mediated cell adhesion, immune response                                 |
| Family_12 | SEC23IP  | SEC23 Interacting Protein                                                                      | 10_121685740_G_T        | splicing                   | c.2313+1G>T                               | 24.7             | endoplasmic reticulum to Golgi vesicle-mediated transport                        |
| Family_13 | GALNT5   | UDP-N-acetyl-alpha-D-galactosamine:polypeptide N-acetylgalactosaminyltransferase 5 (GalNAc-T5) | 2_158157422_C_T         | stopgain SNV               | p.Arg784Ter                               | 44               | mucin-type O-glycosylation of Golgi proteins                                     |
| Family_13 | ABCA8    | ATP-binding cassette, sub-family A (ABC1), member 8                                            | 17_66887690_C_T         | stopgain SNV               | p.Trp988Ter                               | 36               | ATP-dependent lipophilic drug transporter                                        |
| Family_14 | SEPT12   | septin 12                                                                                      | 16_4833555_G_A          | stopgain SNV               | p.Gln212Ter                               | 37               | filament-forming cytoskeletal GTPase, involved in spermatogenesis                |
| Family_14 | POLN     | polymerase (DNA directed) nu                                                                   | 4_2230895_G_A           | stopgain SNV               | p.Gln22Ter                                | 36               | DNA repair and homologous recombination                                          |
| Family_15 | C1orf177 | LEXM, lymphocyte expansion molecule                                                            | 1_55272689_AT_A         | frameshift deletion        | p.Asn44ThrfsTer24                         | 24.8             |                                                                                  |
| Family_15 | ESD      | esterase D                                                                                     | 13_47365507_TC_T        | frameshift deletion        | p.Gly14AspfsTer13                         | 35               | serine hydrolase involved in the detoxification of formaldehyde                  |

\* nomenclature according to Human Genome Structural Variation Consortium in the Ensembl canonical transcript
